# Supplementary material
Source: PubMed Central journal article supplement (PMC2174706)

**Supplemental Figure 1.** FACS analysis of AB33 and AB33 $\Delta$  *pci12* cells. Cultures of the indicated strains were grown for 8 hours in non-inducing conditions (minimal medium with ammonium as nitrogen source, NH<sub>4</sub>) or inducing conditions (minimal medium with nitrate as nitrogen source, NO<sub>3</sub>). Observe that both control and  $\Delta$ *pci12* cells accumulate with a 2C DNA content in inducing conditions.

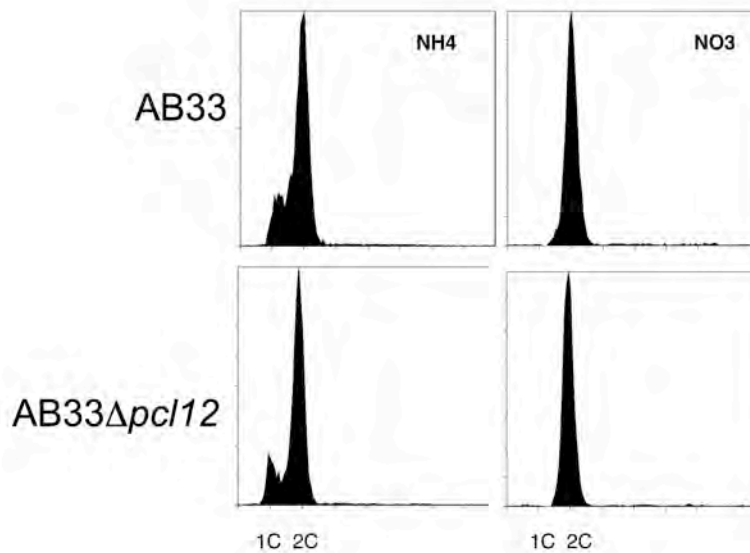

**Supplemental Figure 2.** Confrontation assay. We followed the procedure described by Snetselaar et al., 1996. Briefly, cultures of wild-type and mutant cells were grown overnight in CMD, washed once in distilled sterile water and resuspended to a density of about  $5 \times 10^7$  cells/ml. On a glass microscope slide covered with 2% water agar, 0,5  $\mu$ l drops of each compatible cell suspensions were placed 100 to 200  $\mu$ m apart. The pairs of drops were then covered with paraffin oil and incubated at 28°C. Wild-type combinations produced conjugation tubes that were directed towards the compatible partner. In contrast,  $\Delta pcl12$  were severely impaired in the formation of conjugation tubes. Bar: 20  $\mu$ m

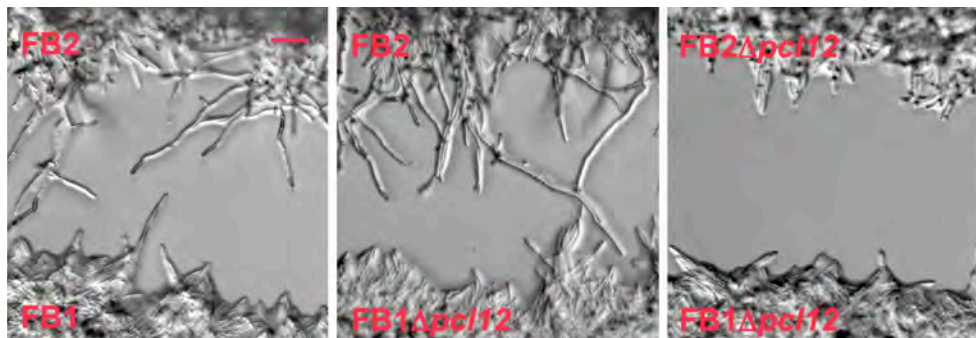

Supplement: plntcell_tpc.107.052738_1.pdf [file plntcell_tpc.107.052738_1.pdf]
